# Supplementary material for: Disruption of a Conservative Motif in the C-Terminal Loop of the KCNQ1 Channel Causes LQT Syndrome
Source: MDPI journal article supplement (doi:10.3390/ijms23147953), 2022-07-19
Supplement: s1 [file s1]

**Table S1.** The parameters of IKs activation curve in CHO-K1 cells of WT, K422E/K422E and WT/K422Et groups. (\* – significant difference from the control group, non-paired t-test,  $p < 0.05$ ).

| Group             | V <sub>50</sub> |      | Slope |      |
|-------------------|-----------------|------|-------|------|
|                   | mean            | SEM  | mean  | SEM  |
| WT/WT, n=15       | 5.56            | 1.86 | 14.7  | 1.76 |
| WT/K422E, n=16    | 19.1*           | 2.36 | 21.6* | 2.53 |
| K422E/K422E, n=17 | 22.4*           | 2.67 | 22.8* | 2.83 |

**Table S2.** Characteristics of simulated action potential in control and heterozygote WT/K422E mutation models

|            | Control | WT/K422E |
|------------|---------|----------|
| APD50 (ms) | 171     | 226      |
| APD90 (ms) | 192     | 249      |
| APA (mV)   | 118.6   | 118.3    |
| RMP (mV)   | -85.7   | -85.5    |

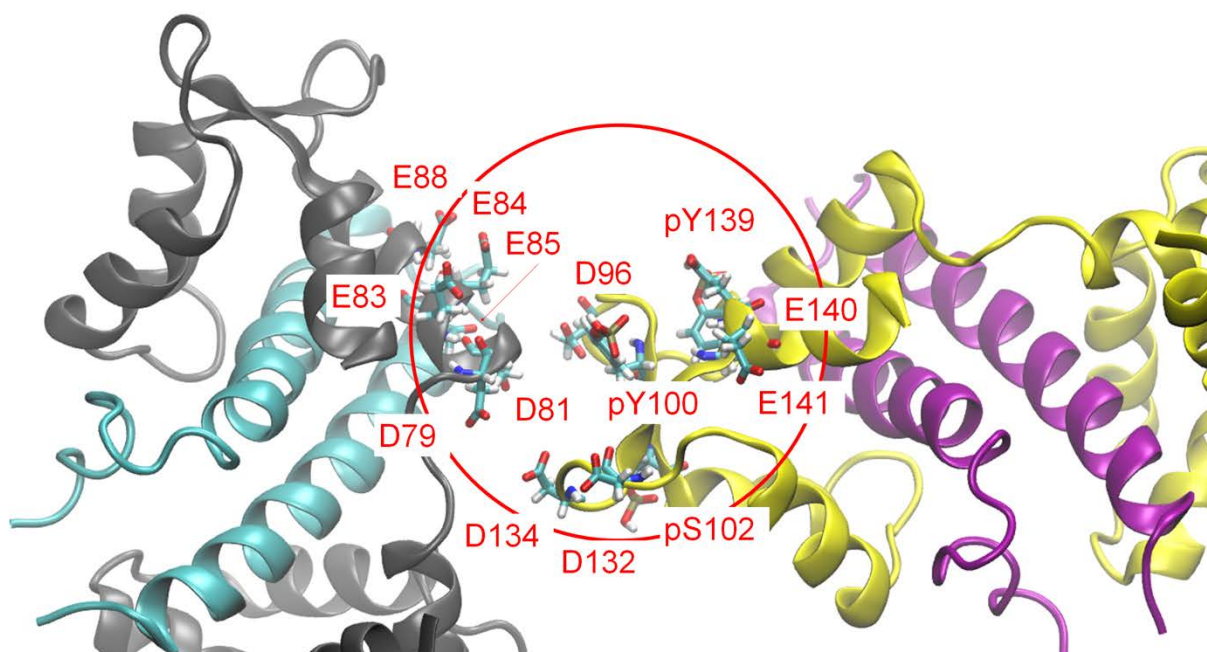

Figure S1. Fragment of KCNQ1-CaM complex. Protein chains are colored according to their IDs. CaM molecules shown in gray and yellow. Negatively charged residues at their interface shown in rod representation and subscribed. Red circle correspond to the region with the highest values of negative potential.
